# Supplementary material
Source: publisher figshare collection journal article supplement (https://tandf.figshare.com/ndownloader/files/22471052)
Supplement: Supplementary file 1 [file 22471052]

**Appendix**

***Appendix A Survey Questions***


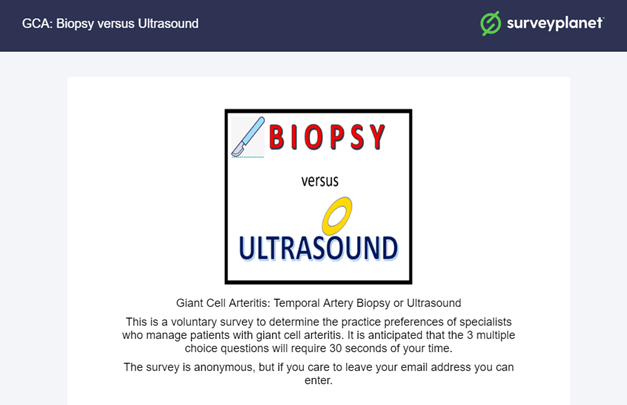

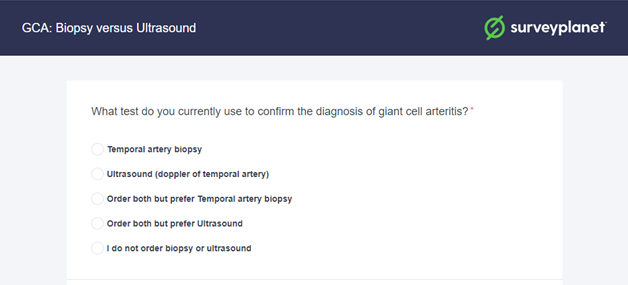


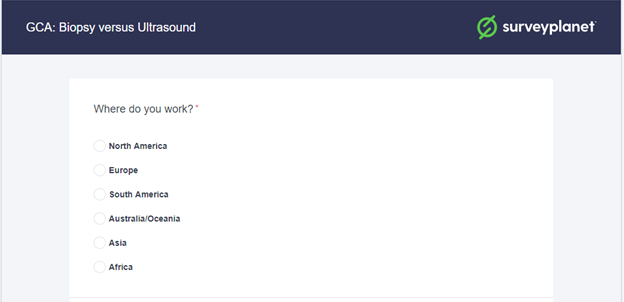

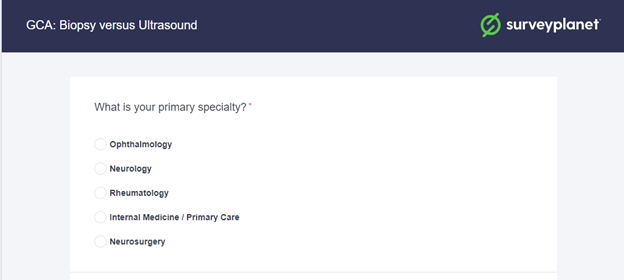


***Appendix B: Estimation of Survey Response Rate***

*Calculations*

NANOS members: 627 American + 55 Canadian = 682

ASOPRS members: 669 American + 28 Canadian = 697

Overlaps in NANOS & ASOPRS estimated at 5%: (682+697)*.95 = 1,310

Ont-Eye internet line ophthalmologists: 463-16-14 = 433

2018 communication with website moderator: 16 NANOS members overlap in Ont-Eye;

14 ASOPRS overlaps in Ont-Eye

EUNOS member: 244 - 4 NA = 240 recipients

Ontario rheumatologists: 270 according to College of Physicans and Surgeons website

Best denominator estimate =2,253

406 (NA + Europe&Israel) respondents/2253 = 18.0% response rate overall

*Abbreviations*

NANOS = North American Neuro-Ophthalmology Society

ASOPRS = American Society of Ophthalmic Plastic & Reconstructive Surgery

Ont-Eye = Eye Physicians and Surgeons of Ontario

EUNOS = European Neuro-ophthalmology Society

NA = North American

CPSO = College of Physicians and Surgeons of Ontario

***Appendix C: Calculation of Survey 95% Confidence Intervals***

Calculation of survey 95% confidence intervals was done using the online tool: <https://www.surveysystem.com/sscalc.htm>

| **Result** | **Sample Size Calculator** |
| --- | --- |
| 303/335 O&N NA +Europe (90.5% prefer TABx). Total estimated 1,983 O&N NA+Europe  95% CI is +/-2.9% | 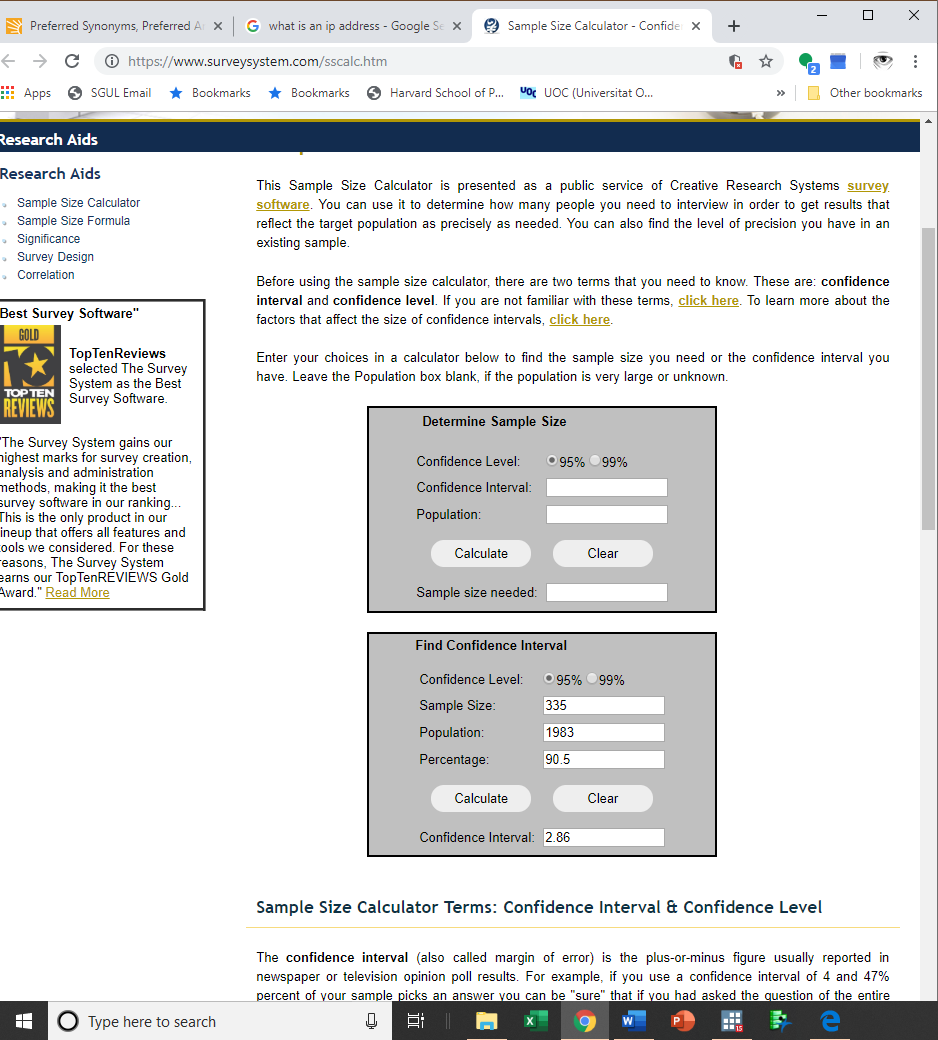 |
| A total of 303 O&N in NA & Europe preferred TABx. 88.4% used TABx exclusively  95% CI is +/-3.32% | 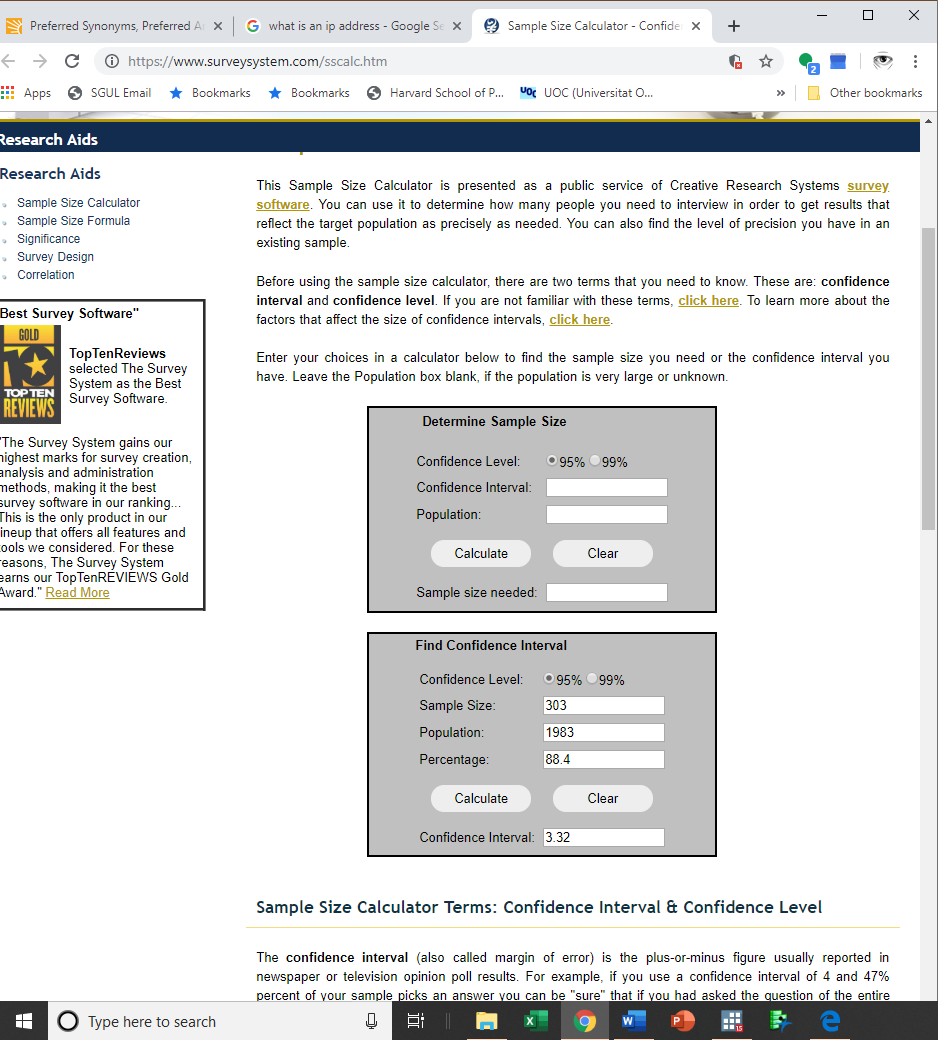 |
| 253 North American O&N / total 1743 O&N in North America with 95.58% choosing TABx  95% CI is +/-2.31% | 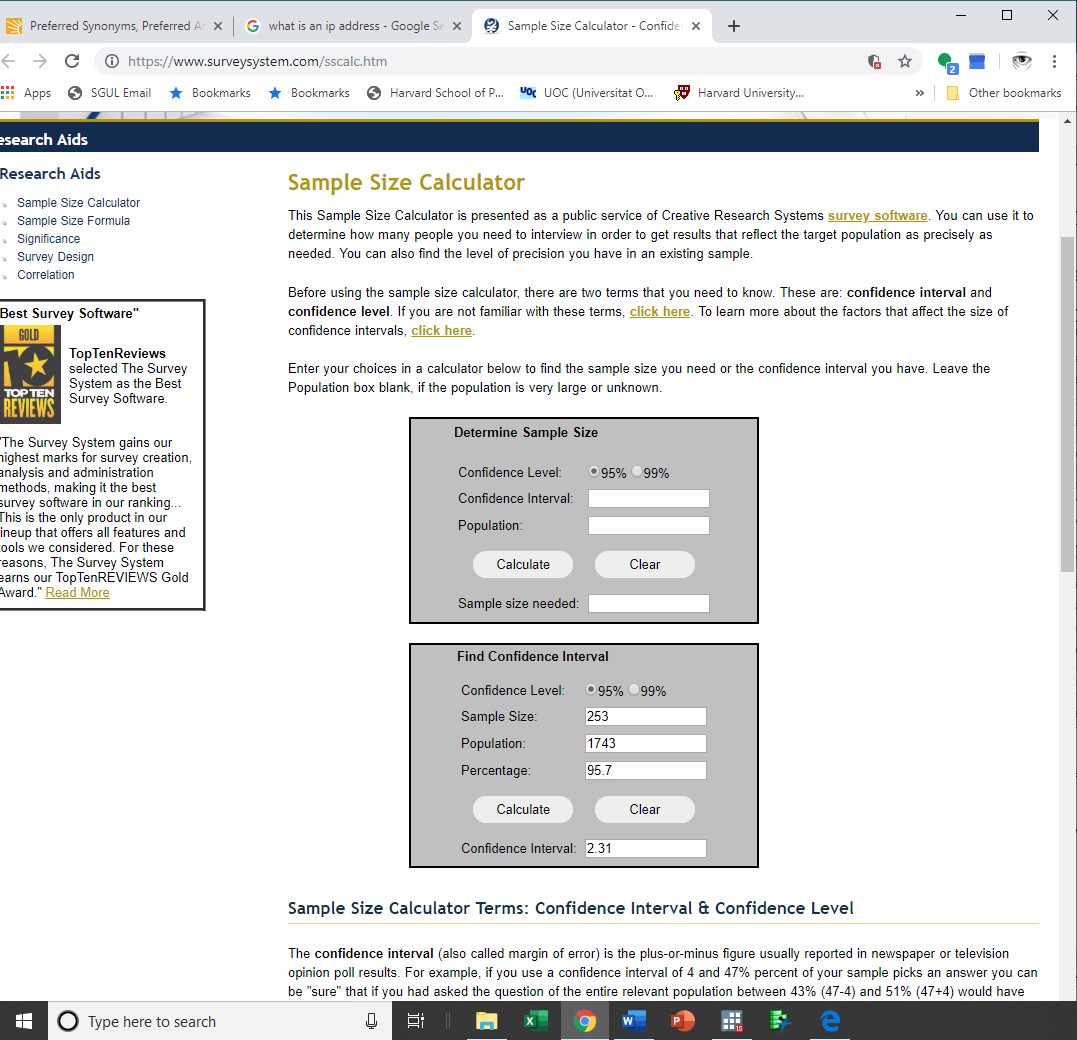 |
| 82 European O&N / total 240 O&N in Europe with 74.39% choosing TABx  95% CI is +/-7.7 % | 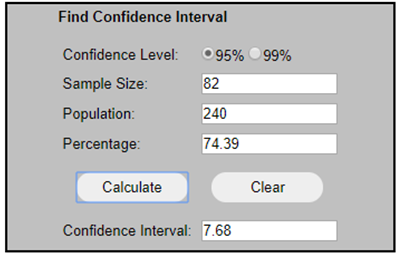 |
| 24.39 +/-7.56 % of op& neuro in Europe prefer US |  |
| 64/71 rheumatologists in survey (90.14% prefer TABx). There are 270 provincially registered rheum  95%CI is +/- 6.0% | 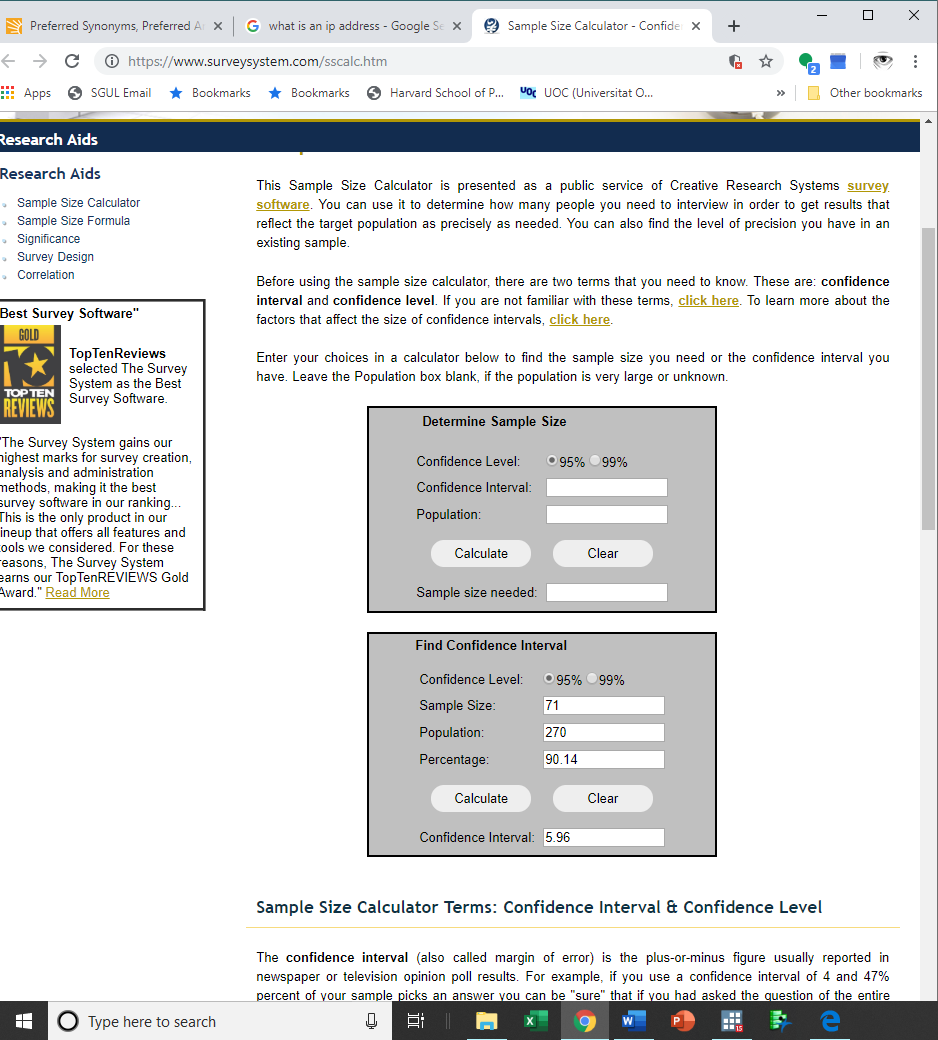 |

***Appendix D: Statistical Tests for Regional Differences in O&N Preference for TABx***

*Chi Square Test*

|  | **Region** | | |
| --- | --- | --- | --- |
|  | **Europe** | **North America** | **Total** |
| **Neither** | 1 | 9 | 10 |
|  |  |  |  |
|  |  |  |  |
| **TABx** | 61 | 242 | 303 |
|  |  |  |  |
|  |  |  |  |
| **US** | 20 | 2 | 22 |
|  |  |  |  |
|  |  |  |  |
| **Total** | 82 | 253 | 335 |
|  |  |  |  |
|  |  |  |  |

Pearson Chi2 = 56.7492 Pr = < 0.001

*Conventional 2 Sample Tests of Proportions*

Although the test is not adjusted for survey weighting, given the 21% difference and survey confidence intervals, there would be no change in the inference.

Two-sample test of proportions x: Number of obs = 253

y: Number of obs = 82

|  | Mean | Std. Err. | z | P>|z| | [95% Conf. Interval] | |
| --- | --- | --- | --- | --- | --- | --- |
| x | .9565217 | .012821 |  |  | .931393 | .9816505 |
| y | .7439024 | .0482007 |  |  | .6494307 | .8383742 |
| diff | .2126193 | .0498768 |  |  | .1148626 | .310376 |
|  | under Ho: | .0373514 | 5.69 | 0.000 |  |  |

diff = prop(x) - prop(y) z = 5.6924

Ho: diff = 0

Ha: diff < 0 Ha: diff != 0 Ha: diff > 0

Pr(Z < z) = 1.0000 Pr(|Z| > |z|) = 0.0000 Pr(Z > z) = 0.0000

***Appendix E: Statistical Tests for Specialty Differences in Preference for TABx***

tab confirmtestcategory specialtycat

| SpecialtyCAT

ConfirmTestCATEGORY | Neurology Ophthal.. Rheumat.. | Total

----------------------+---------------------------------+----------

Neither | 0 10 3 | 13

Temporal artery bio.. | 34 269 64 | 367

Ultrasound (doppler.. | 3 19 4 | 26

----------------------+---------------------------------+----------

Total | 37 298 71 | 406

. prtesti 37 34 298 269, count

Two-sample test of proportions x: Number of obs = 37

y: Number of obs = 298

------------------------------------------------------------------------------

| Mean Std. Err. z P>|z| [95% Conf. Interval]

-------------+----------------------------------------------------------------

x | .9189189 .0448743 .8309669 1.006871

y | .9026846 .0171692 .8690335 .9363356

-------------+----------------------------------------------------------------

diff | .0162344 .0480467 -.0779354 .1104041

| under Ho: .0512348 0.32 0.751

------------------------------------------------------------------------------

diff = prop(x) - prop(y) z = 0.3169

Ho: diff = 0

Ha: diff < 0 Ha: diff != 0 Ha: diff > 0

Pr(Z < z) = 0.6243 Pr(|Z| > |z|) = 0.7513 Pr(Z > z) = 0.3757

. prtesti 71 64 298 269, count

Two-sample test of proportions x: Number of obs = 71

y: Number of obs = 298

------------------------------------------------------------------------------

| Mean Std. Err. z P>|z| [95% Conf. Interval]

-------------+----------------------------------------------------------------

x | .9014085 .0353795 .8320659 .970751

y | .9026846 .0171692 .8690335 .9363356

-------------+----------------------------------------------------------------

diff | -.0012761 .0393254 -.0783526 .0758003

| under Ho: .0391853 -0.03 0.974

------------------------------------------------------------------------------

diff = prop(x) - prop(y) z = -0.0326

Ho: diff = 0

Ha: diff < 0 Ha: diff != 0 Ha: diff > 0

Pr(Z < z) = 0.4870 Pr(|Z| > |z|) = 0.9740 Pr(Z > z) = 0.5130

. prtesti 71 64 37 34, count

Two-sample test of proportions x: Number of obs = 71

y: Number of obs = 37

------------------------------------------------------------------------------

| Mean Std. Err. z P>|z| [95% Conf. Interval]

-------------+----------------------------------------------------------------

x | .9014085 .0353795 .8320659 .970751

y | .9189189 .0448743 .8309669 1.006871

-------------+----------------------------------------------------------------

diff | -.0175105 .0571438 -.1295102 .0944892

| under Ho: .0587721 -0.30 0.766

------------------------------------------------------------------------------

diff = prop(x) - prop(y) z = -0.2979

Ho: diff = 0

Ha: diff < 0 Ha: diff != 0 Ha: diff > 0

Pr(Z < z) = 0.3829 Pr(|Z| > |z|) = 0.7658 Pr(Z > z) = 0.6171
